# Supplementary material for: Screen of Non-annotated Small Secreted Proteins of Pseudomonas syringae Reveals a Virulence Factor That Inhibits Tomato Immune Proteases
Source: PubMed Central journal article supplement (PMC5014320; doi:10.1371/journal.ppat.1005874), 2016-09-07
Supplement: ppat.1005874.s005.pdf [file ppat.1005874.s005.pdf]

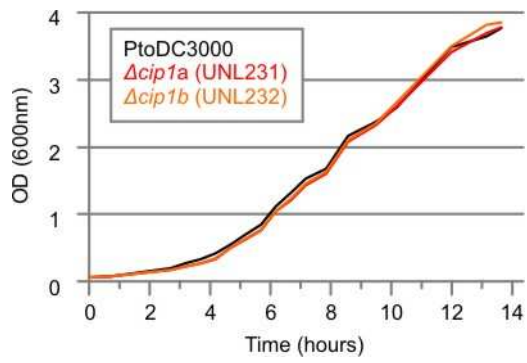

**Figure S5.**  $\Delta cip1$  deletion mutants grow normally *in vitro*.

WT and two independent  $\Delta cip1$  mutants were inoculated at OD=0.05 in LB medium without antibiotics at 28°C and bacterial growth was measured every 30 minutes at OD<sub>600</sub>. Similar results were obtained in repetition experiments.
