# Supplementary material for: Screen of Non-annotated Small Secreted Proteins of Pseudomonas syringae Reveals a Virulence Factor That Inhibits Tomato Immune Proteases
Source: PubMed Central journal article supplement (PMC5014320; doi:10.1371/journal.ppat.1005874), 2016-09-07
Supplement: ppat.1005874.s006.pdf [file ppat.1005874.s006.pdf]

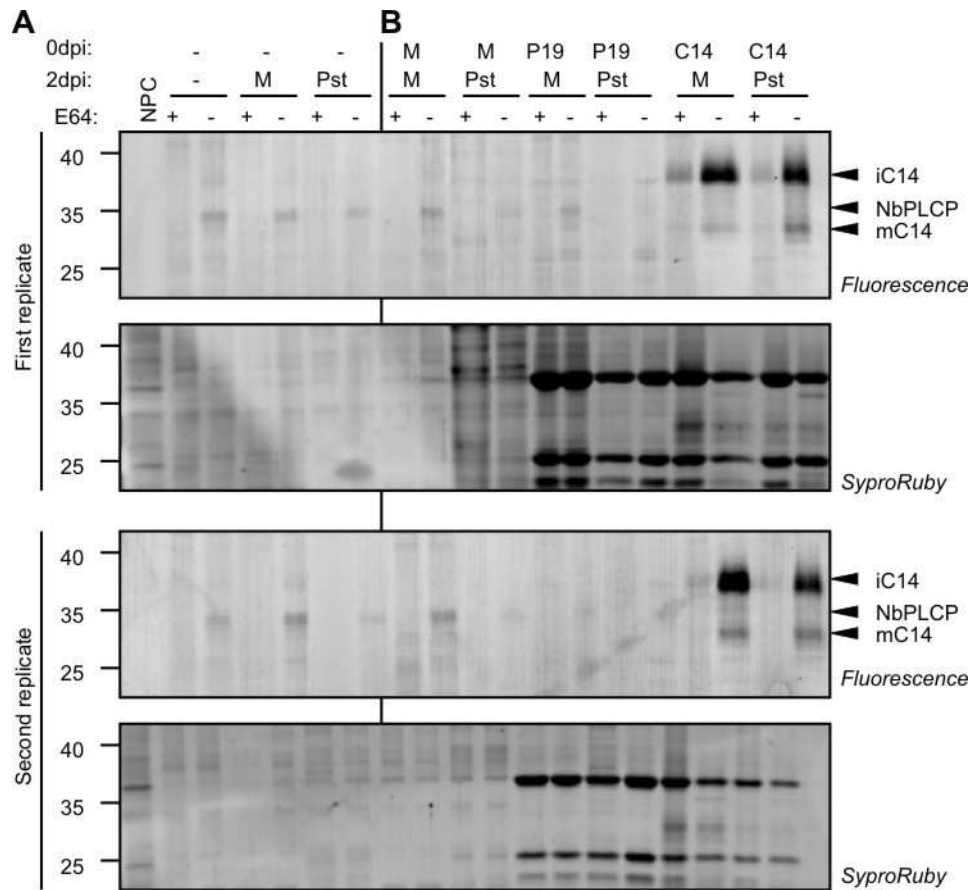

**Figure S6** PtoDC3000 infection has no significant effect on protease activity in AF. Leaves of *N. benthamiana* plants were untreated (A) or infiltrated (B) at 0 days-post-infiltration (0dpi) with water (Mock, M), or with *Agrobacterium tumefaciens* (OD=0.5) carrying the P19 silencing inhibitor alone (P19), or mixed with agrobacterium carrying C14 (C14). Two days later (2dpi), PtoDC3000( $\Delta$ hopQ1-1) was infiltrated at OD=0.001 (Pst), or water was used as mock control (M). Apoplastic fluids were isolated two days later (4dpi) and preincubated with and without 100  $\mu$ M E-64 for 30 minutes and then labeled with 2  $\mu$ M MV201 for 5 hours. Proteins were separated on 14% SDS-PAGE and the gel was scanned for fluorescence (532nm excitation, 580BP filter, 600PMT) and stained by Sypro Ruby.
